# Supplementary material for: Raman spectroscopy of ovarian and peritoneal tissue in the assessment of ovarian cancer
Source: Royal Society of Chemistry journal article supplement (doi:10.1039/d4an01293c), 2025-01-01
Supplement: d4an01293c1.pdf [file d4an01293c1.pdf]

## Ovarian Tissue

### Cancer vs Benign

a)

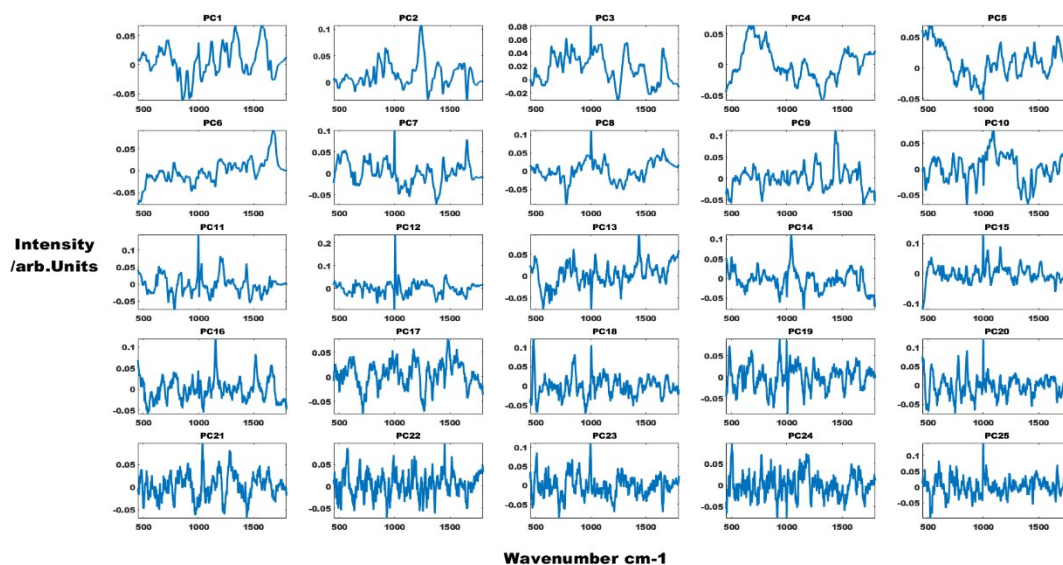

b)

| Principal Component | F value ( $F_{crit} 10.8, p=0.001$ ) |
|---------------------|--------------------------------------|
| 1                   | 859                                  |
| 4                   | 160                                  |
| 5                   | 110                                  |
| 3                   | 85                                   |
| 12                  | 77                                   |
| 2                   | 69                                   |
| 9                   | 56                                   |
| 13                  | 54                                   |
| 15                  | 33                                   |
| 11                  | 24                                   |
| 23                  | 26                                   |
| 19                  | 14                                   |
| 20                  | 12                                   |

c)

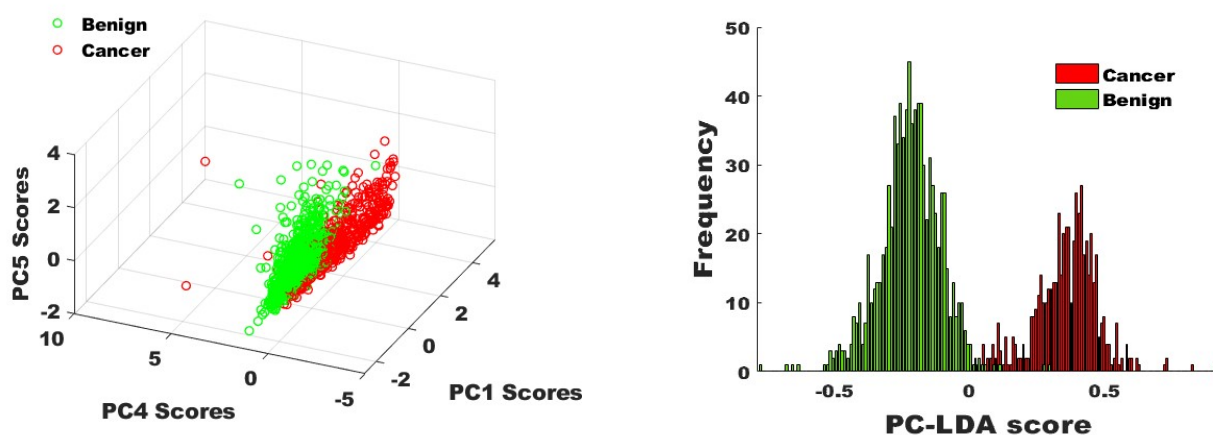

Figure S1 – Principal component analysis of cancer and benign ovarian spectra. a) The loadings of the 25 principal components generated from the dataset. b) Summary of PCs with an F value greater than  $F_{crit}$  on analysis of variance (ANOVA), with a p value of 0.001 for the significance of the test. c) PCA scores plot.

# Ovarian Tissue

## Cancer vs Borderline

a)

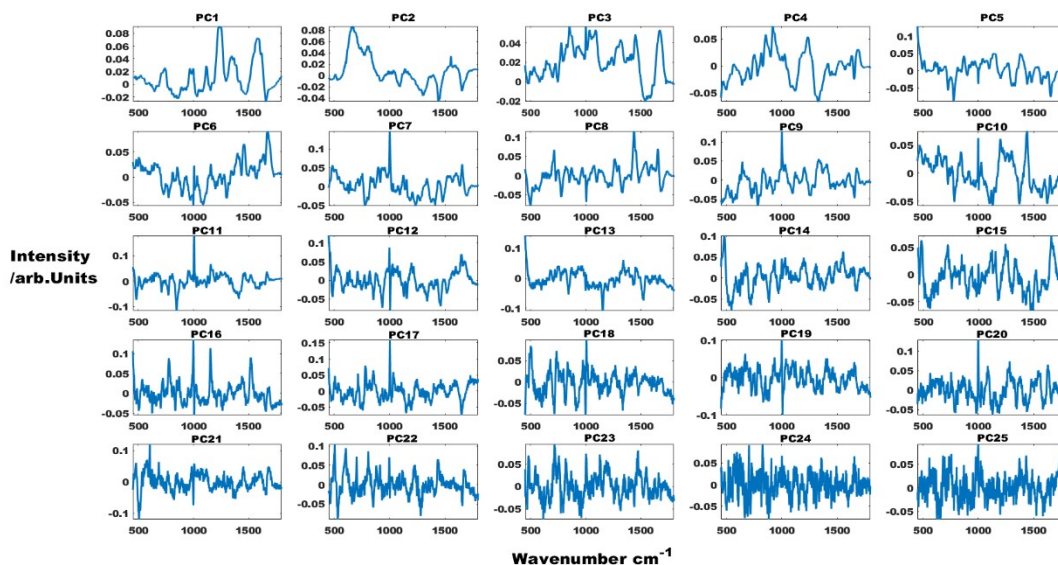

b)

| Principal Component | F value ( $F_{crit} 11, p=0.001$ ) |
|---------------------|------------------------------------|
| 11                  | 163                                |
| 6                   | 157                                |
| 1                   | 133                                |
| 10                  | 88                                 |
| 2                   | 86                                 |
| 9                   | 63                                 |
| 12                  | 57                                 |
| 17                  | 55                                 |
| 19                  | 31                                 |
| 5                   | 23                                 |
| 3                   | 16                                 |

c)

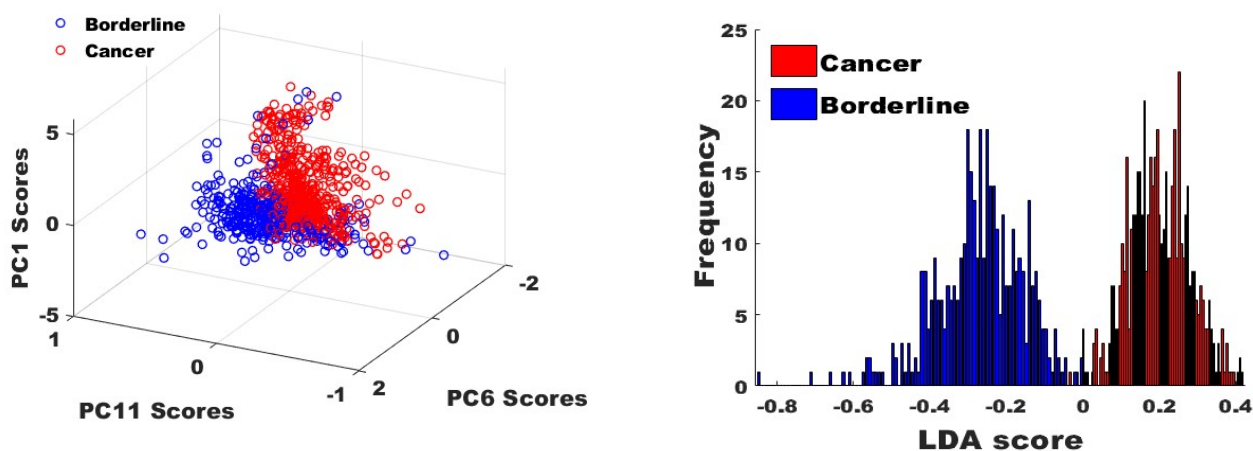

Figure S2 – Principal component analysis of cancer and borderline ovarian spectra. a) The loadings of the 25 principal components generated from the dataset. b) Summary of PCs with an F value greater than  $F_{crit}$  on analysis of variance (ANOVA), with a p value of 0.001 for the significance of the test. c) PCA scores plot and histogram.

# Ovarian Tissue

## Borderline vs Benign

a)

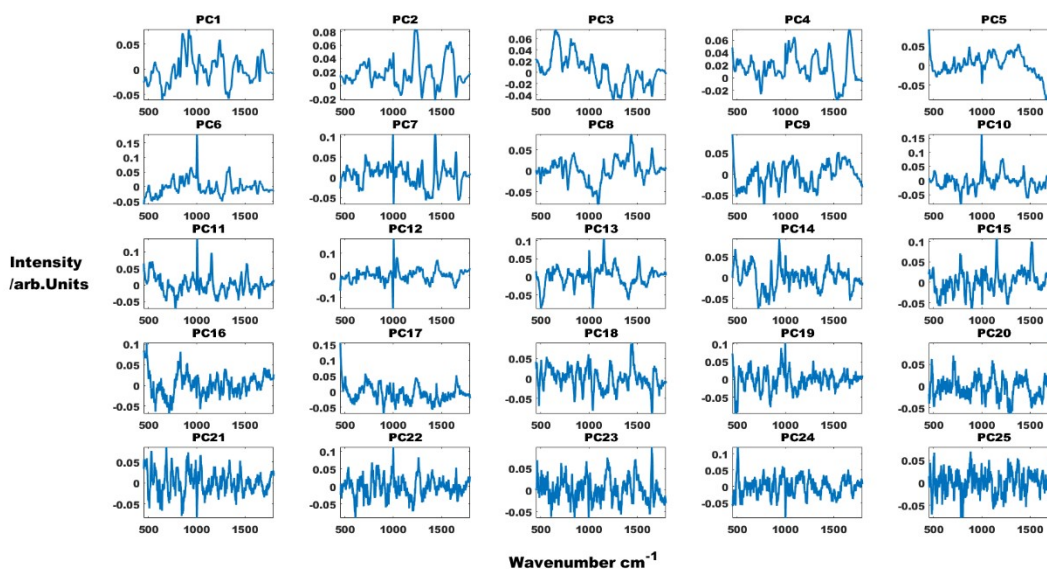

b)

| Principal Component | F value ( $F_{crit} 11, p=0.001$ ) |
|---------------------|------------------------------------|
| 1                   | 751                                |
| 13                  | 133                                |
| 12                  | 93                                 |
| 7                   | 57                                 |
| 6                   | 56                                 |
| 14                  | 33                                 |
| 24                  | 23                                 |
| 23                  | 17                                 |
| 15                  | 13                                 |

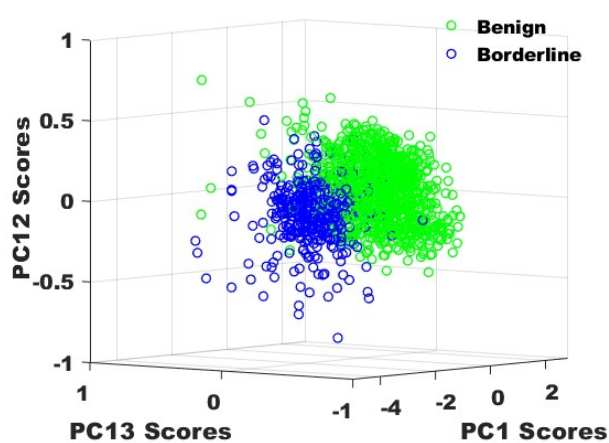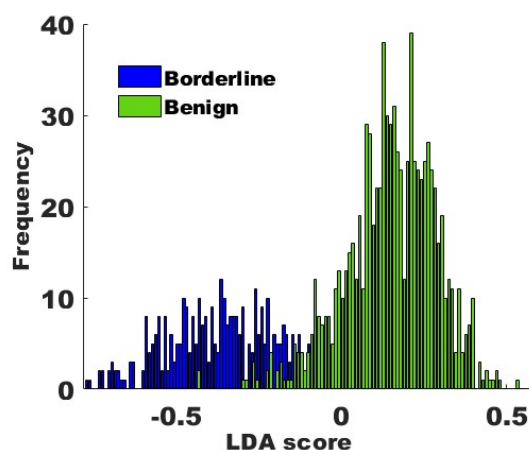

c)

Figure S3 – Principal component analysis of borderline and benign ovarian spectra. a) The loadings of the 25 principal components generated from the dataset. b) Summary of PCs with an F value greater than  $F_{crit}$  on analysis of variance (ANOVA), with a p value of 0.001 for the significance of the test. c) PCA scores plot and histogram.



# Peritoneal Tissue

## Cancer vs Benign (Primary Surgery)

a)

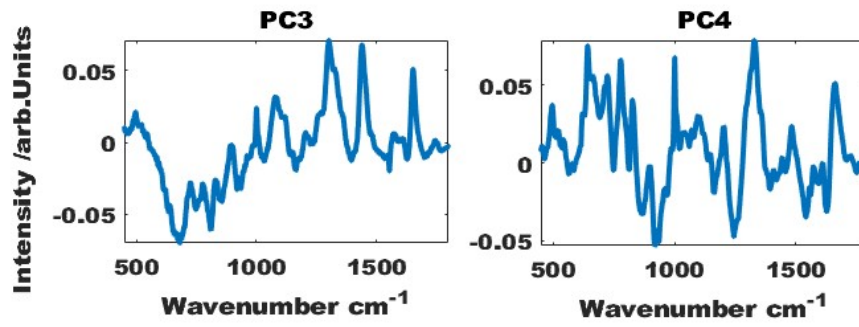

b)

| Principal Component | F value ( $F_{\text{crit}} 10.9, p=0.001$ ) |
|---------------------|---------------------------------------------|
| 4                   | 964                                         |
| 3                   | 72                                          |

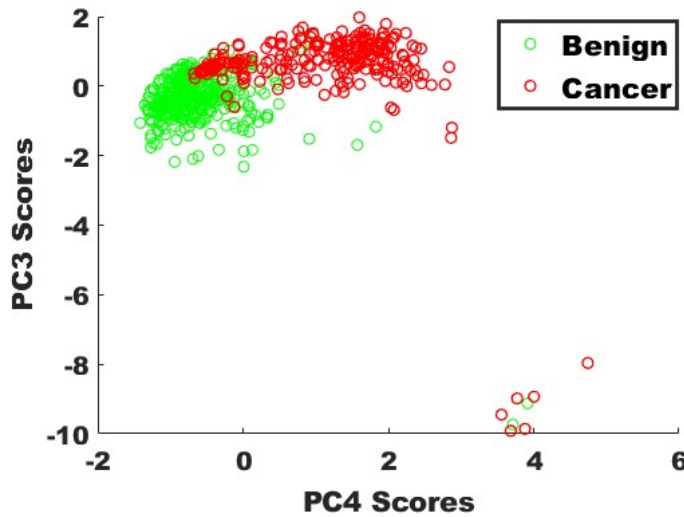

c)

Figure S4 – Principal component loadings for the two PCs of significance on analysis of variance (ANOVA) for cancer vs benign (primary surgery) peritoneal spectra. C) PCA scores plot and histogram.

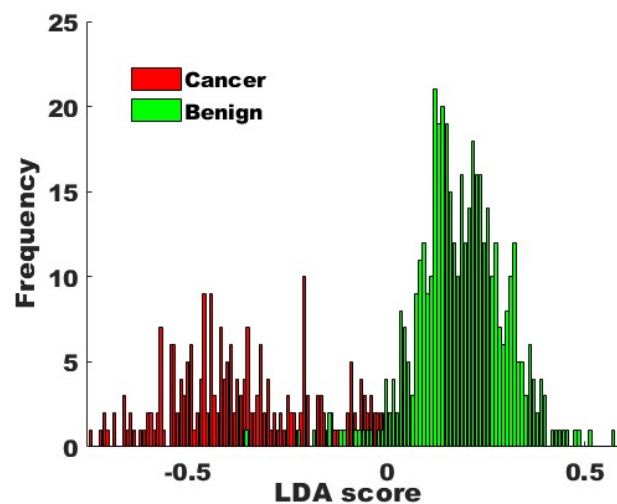

# Peritoneal Tissue

## Cancer vs Benign (Interval Surgery)

a)

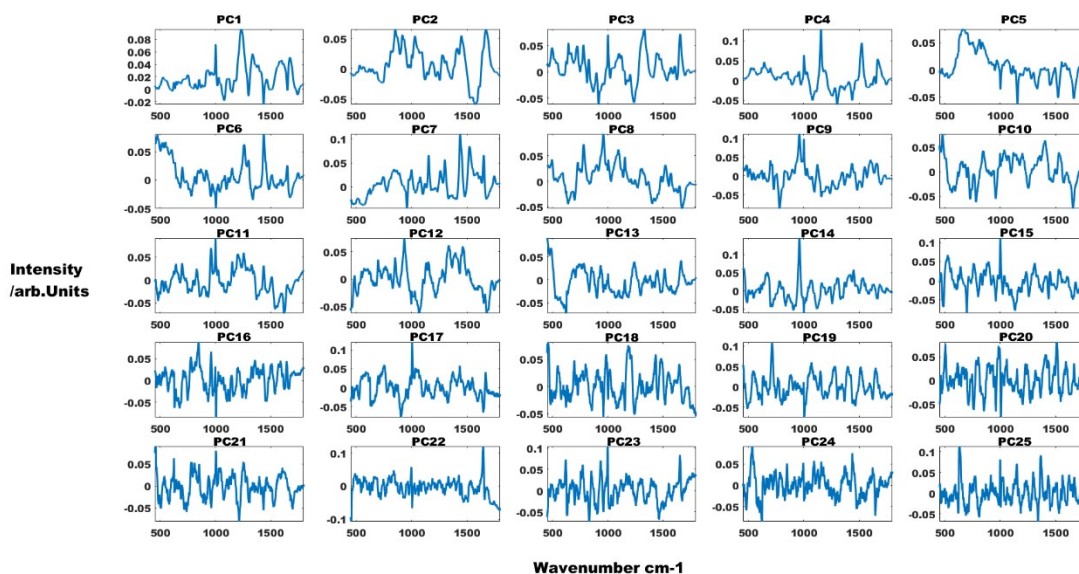

b)

| Principal Component | F value ( $F_{crit} 11, p=0.001$ ) |
|---------------------|------------------------------------|
| 10                  | 119                                |
| 18                  | 49                                 |
| 4                   | 41                                 |
| 12                  | 18                                 |
| 7                   | 17                                 |
| 2                   | 17                                 |
| 6                   | 17                                 |
| 20                  | 15                                 |

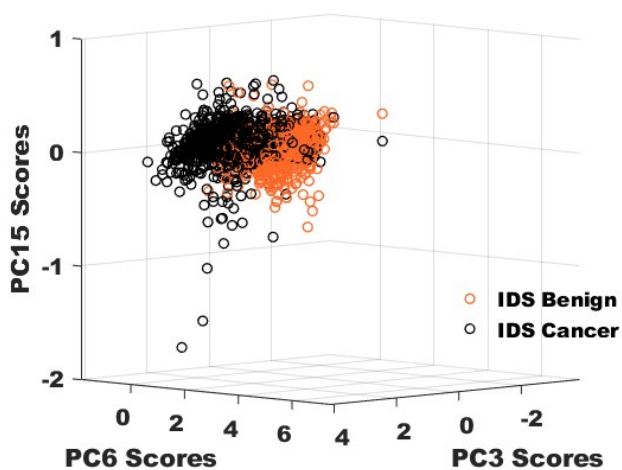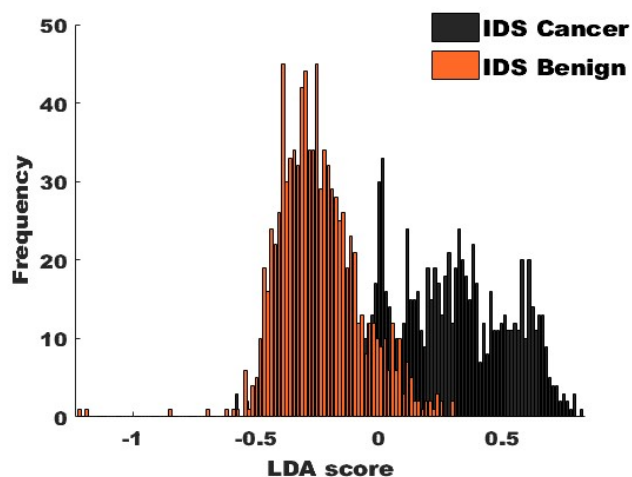

c)

Figure S5 – Principal component analysis of cancer and benign (interval surgery) peritoneal spectra. a) The loadings of the 25 principal components generated from the dataset. b) Summary of PCs with an F value greater than  $F_{crit}$  on analysis of variance (ANOVA), with a p value of 0.001 for the significance of the test. c) PCA scores plot and histogram.

# Peritoneal Tissue

## Cancer Primary surgery vs Cancer Interval Surgery

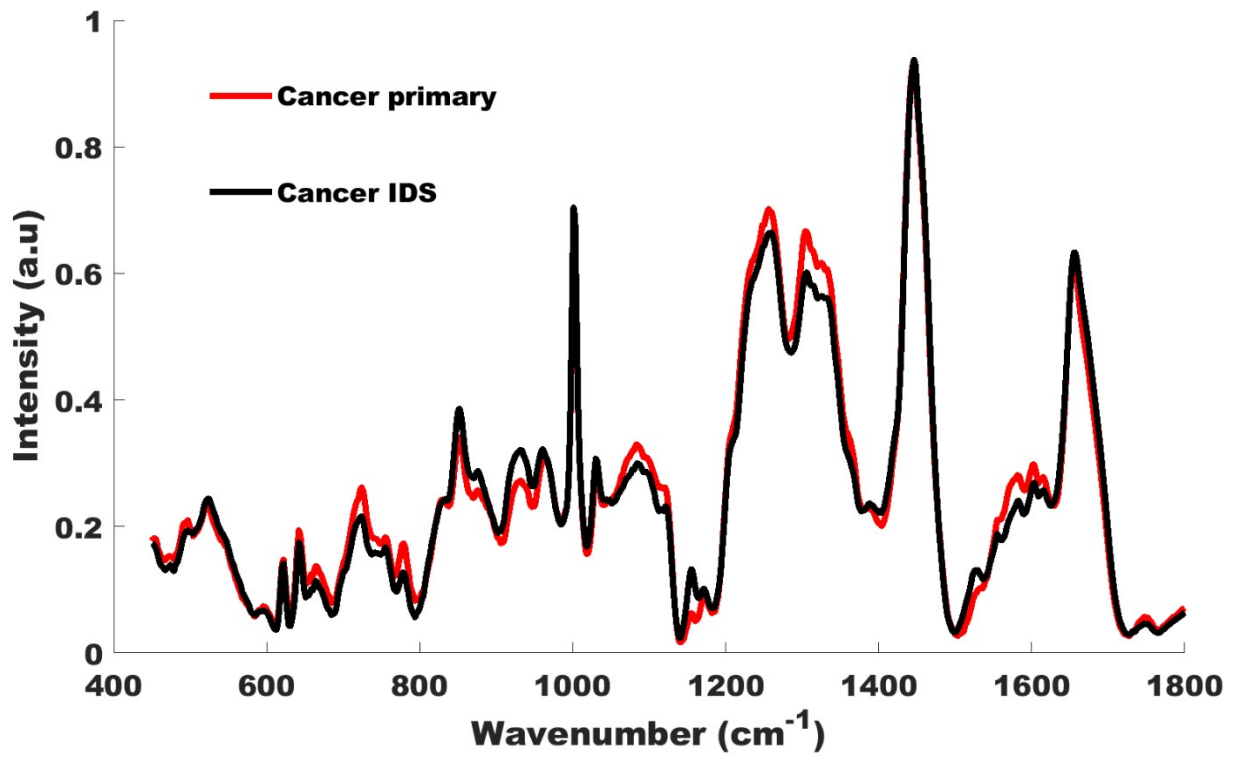

a)

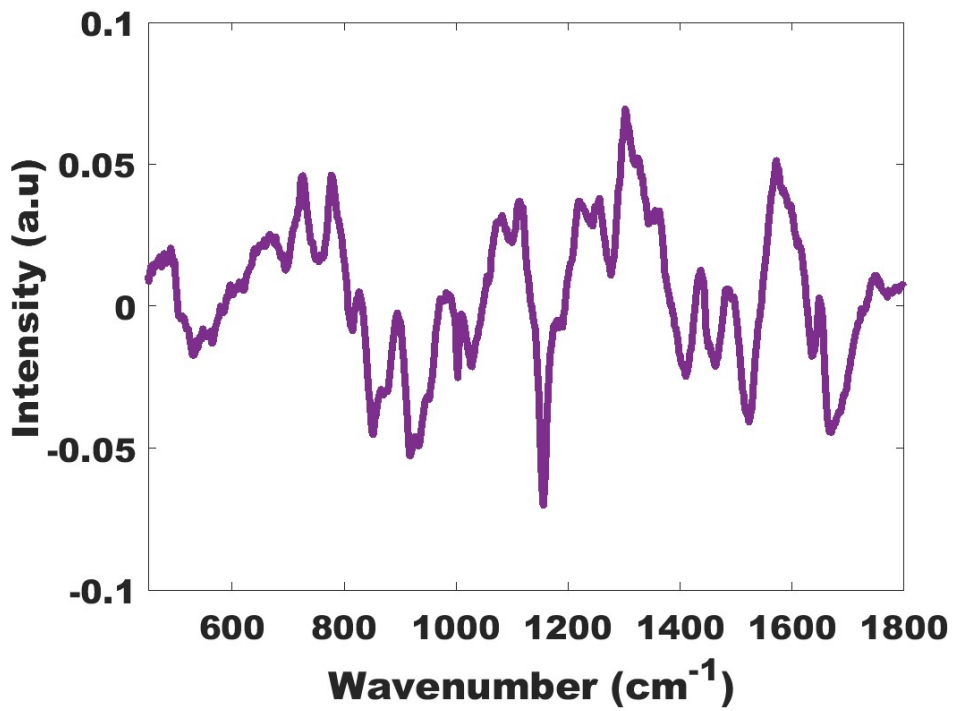

b)

Figure S6 – Spectra of peritoneal tissue. a) Mean comparison of primary surgery cancer and interval debulking surgery cancer groups. b) Difference between the mean spectrum of the groups: primary surgery cancer minus interval debulking surgery cancer

---



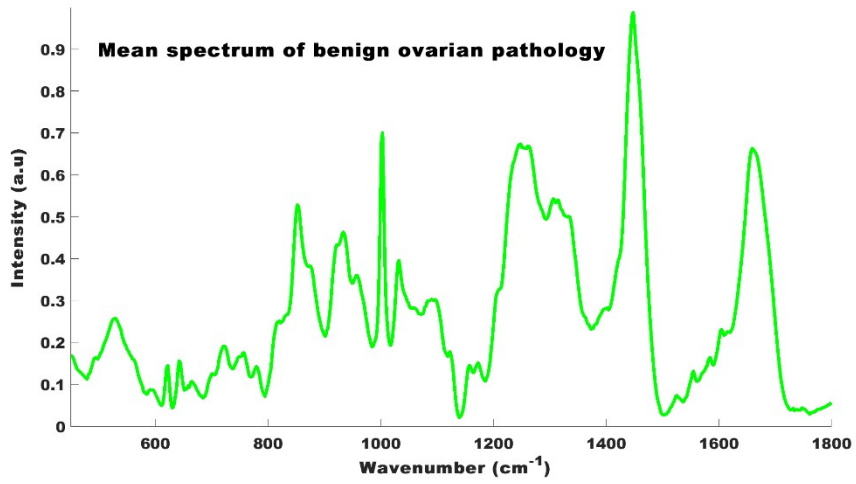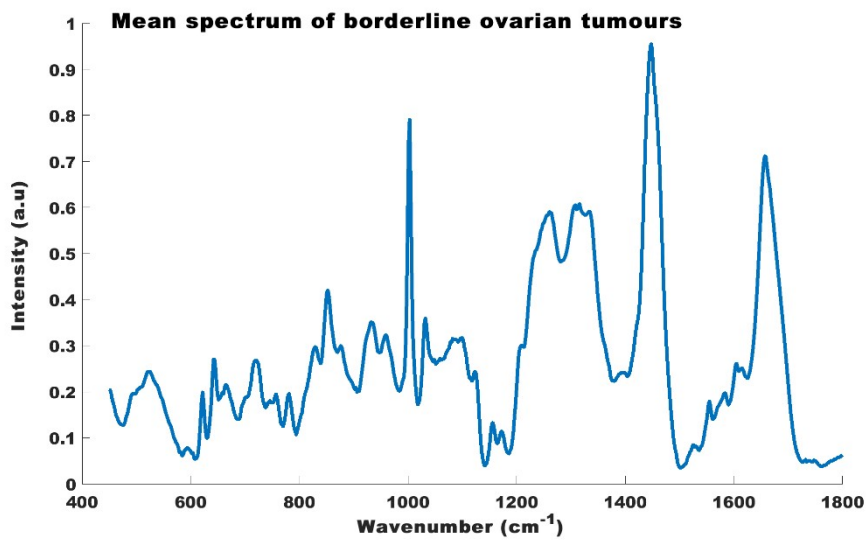

Group mean spectra

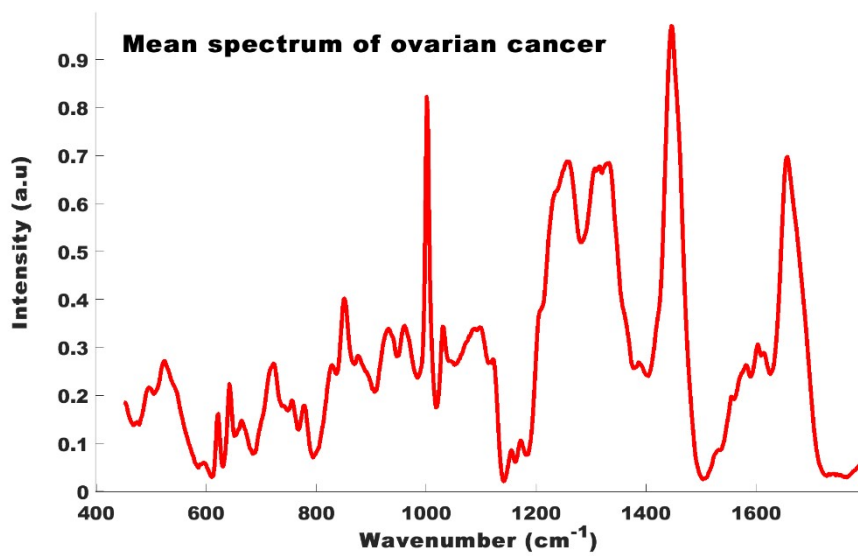

Figure S7 – Mean spectra of benign, borderline and cancer in ovarian tissue.

---
